# Supplementary material
Source: publisher site journal article supplement (https://www.dovepress.com/article/457056)
Supplement: Supplementary file 1 [file get_supplementary_file.php]

# Appendix A

## The specific interview outline

| 1、Do you make any preparation prior to your face-to-face communication with patients? Are these preparations useful? |
| --- |
| 2、What kind of information will you focus on during your face-to-face communication with patients? Will you ask some life details? (There will be no need to provide any hint if doctors can answer this question fluently; however if the answer is very brief, you can provide the following hints, including patients’ personal status, lifestyle, history of illness, the impact of illness on the quality of life, patients’ concern on their health issue and past diagnosis history among others.) |
| 3、When performing the physical examination, what kinds of questions will you ask to your patients? (There will be no need to provide any hint if doctors can answer this question fluently; however if the answer is very brief, you can provide the following hints, including patients’ personal status, lifestyle, history of illness, the impact of illness on the quality of life, patients’ concern on their health issue and past diagnosis history among others.) |
| 4、When communicating with patients, do you give them sufficient enough time to express their ideas? |
| 5、Will you explain the reasons of having particular medical tests to your patients? Will you explain the test results to your patients? |
| 6、If patients are in fear of having medical tests, will you express your care and understanding to your patients? How will you do that? |
| 7、At the end of medical consultation, will you explain the requirements for follow-up medical treatment to your patients? Or do you allow them to ask questions? |
| 8、What are the major obstacles of having face-to-face communication? Do you think such obstacles can be alleviated by online consultation？ |
| 9、Will you be affected by patients’ emotional state? |
| 10、Does an effective communication have any positive impact on patient's compliance with the doctor's instructions and the effect of follow-up treatment? |
| 11、Will you communicate with patients online? Through what kind of online platform? What are the differences between online and offline communication? What are the advantages and disadvantages of online communication? |
